# Supplementary material
Source: PubMed Central journal article supplement (PMC3610173)
Supplement: NIHMS293110-supplement-04.pdf [file NIHMS293110-supplement-04.pdf]

**Supplemental Table 1: Oligonucleotide primers used in this study**

| Primer Use (Abbreviation)                  | Sequence                               |
|--------------------------------------------|----------------------------------------|
| PCR: exon 1 (Ex1F)                         | F: 5' CCCTTGGTGTTCTGCCATAA 3'          |
| PCR/expression: exon 2<br>(Ex2F)           | F: 5' CATTCTGGATTGCTGTCTGTC 3'         |
| PCR: exon 3 (Ex3F)                         | F: 5' GAAGCTACCAGAACCACATC 3'          |
| PCR/expression: start of 3'<br>UTR (UTR1R) | R: 5' AGTTCTCACATCCAGGATC 3'           |
| PCR: end of 3' UTR<br>(UTR2R)              | R: 5' GGTCTGTGAGATCATTTCAGC 3'         |
| 5' RACE: 3' UTR<br>(RACE_OUT)              | R: 5' CCAGGCCAGCAGCAGGTTCTCACATC<br>3' |
| 5' RACE: exon 3<br>(RACE_IN)               | R: 5' GCTTCTCCACCCAGGACTGAGCAGG 3'     |

**Supplemental Table 4: HLA-DR/DQ stratified analysis for rs1233478**

We performed a stratified analysis for rs1233478, restricting the analysis to *HLA-DR/DQ* groups with more than 100 chromosomes. The overall case/control association is also presented so the direction of odds ratios can be compared.

| HLA-DR/DQ            | Total | Case A | Control A | Case C | Control C | p-value | Odds Ratio |
|----------------------|-------|--------|-----------|--------|-----------|---------|------------|
| Overall (all groups) | 8191  | 1394   | 433       | 4044   | 2320      | 3.2E-25 | 1.85       |
| DRB1*0101-DQB1*0501  | 446   | 40     | 17        | 227    | 162       | 0.1     | 1.68       |
| DRB1*0301-DQB1*0201  | 1579  | 566    | 141       | 737    | 135       | 0.023   | 0.74       |
| DRB1*0401-DQB1*0302  | 1132  | 206    | 14        | 834    | 78        | 0.3     | 1.38       |
| DRB1*0401-DQB1*0301  | 221   | 14     | 9         | 102    | 96        | 0.5     | 1.46       |
| DRB1*0402-DQB1*0302  | 164   | 13     | 1         | 130    | 20        | 1       | 2          |
| DRB1*0404-DQB1*0302  | 308   | 34     | 6         | 224    | 44        | 1       | 1.11       |
| DRB1*0405-DQB1*0302  | 146   | 35     | 1         | 97     | 13        | 0.2     | 4.69       |
| DRB1*0701-DQB1*0201  | 367   | 16     | 21        | 147    | 183       | 1       | 0.95       |
| DRB1*0801-DQB1*0402  | 145   | 29     | 4         | 72     | 40        | 9.6E-03 | 4.03       |
| DRB1*1101-DQB1*0301  | 199   | 5      | 12        | 49     | 133       | 0.8     | 1.13       |
| DRB1*1301-DQB1*0603  | 164   | 8      | 12        | 44     | 100       | 0.4     | 1.52       |
| DRB1*1302-DQB1*0604  | 222   | 21     | 9         | 127    | 65        | 0.8     | 1.19       |
| DRB1*1501-DQB1*0602  | 337   | 10     | 29        | 36     | 262       | 0.043   | 2.51       |
| DRB1*1601-DQB1*0502  | 125   | 5      | 2         | 65     | 53        | 0.5     | 2.04       |

**Supplemental Table 5: Expression results from Taqman quantitative PCR.**

Taqman was performed using 40 cycles for experiments 1 and 2, and 45 cycles for experiment 3. Results are expressed as Ct, the number of PCR cycles required for the transcript to appear. *LOC729653* is present at low levels in many tissues. Results are grouped by the number of experiments (out of 3) in which a tissue expressed the transcript.

| <b>Sample Name</b>          | <b>Experiment 1<br/>(40 cycles)</b> | <b>Experiment 2<br/>(40 cycles)</b> | <b>Experiment 3<br/>(45 cycles)</b> | <b>Mean Ct</b> |
|-----------------------------|-------------------------------------|-------------------------------------|-------------------------------------|----------------|
| Found in 3 of 3 experiments |                                     |                                     |                                     |                |
| epididymis                  | 33                                  | 33.16                               | 30.3                                | 32.2           |
| intestine (small)           | 35.09                               | 35.28                               | 32.29                               | 34.2           |
| stomach                     | 34.89                               | 35                                  | 34.77                               | 34.9           |
| uterus                      | 35.1                                | 35.3                                | 34.29                               | 34.9           |
| duodenum (descending)       | 34.36                               | 35.76                               | 35.13                               | 35.1           |
| vagina                      | 34.61                               | 35.57                               | 35.44                               | 35.2           |
| lung                        | 35.91                               | 36.4                                | 33.39                               | 35.2           |
| rectum                      | 35.71                               | 35.52                               | 34.81                               | 35.3           |
| thymus                      | 35.03                               | 34.94                               | 36.11                               | 35.4           |
| urinary bladder             | 35.54                               | 35                                  | 35.56                               | 35.4           |
| prostate                    | 36.16                               | 37.52                               | 36.15                               | 36.6           |
| fat                         | 37.67                               | 36.21                               | 36.16                               | 36.7           |
| lymph node                  | 39.19                               | 36.96                               | 35.48                               | 37.2           |
| testis                      | 37.57                               | 38.63                               | 36.3                                | 37.5           |
| urethra                     | 39.21                               | 37.31                               | 37.27                               | 37.9           |
| cervix                      | 39.58                               | 39.3                                | 35.28                               | 38.1           |
| bone marrow                 | 39.85                               | 38.6                                | 37.21                               | 38.6           |
| whole pancreas (purified)   | 39.72                               | 39.42                               | 39.99                               | 39.7           |
| colon                       | 39.32                               | 39.14                               | 40.71                               | 39.7           |
| Found in 2 of 3 experiments |                                     |                                     |                                     |                |
| retina                      | >40                                 | 37.77                               | 36.53                               | 38.1           |

|                               |       |       |       |      |
|-------------------------------|-------|-------|-------|------|
| seminal vesicles              | >40   | 36.4  | 38.36 | 38.3 |
| trachea                       | 38.36 | >40   | 37.18 | 38.5 |
| penis                         | 39.54 | >40   | 36.01 | 38.5 |
| spleen                        | >40   | 39.44 | 37.59 | 39.0 |
| pancreas                      | 39.35 | >40   | 37.74 | 39.0 |
| ovary                         | >40   | 39.58 | 37.6  | 39.1 |
| vena cava                     | >40   | 38.97 | 38.66 | 39.2 |
| skin                          | >40   | 39.54 | 38.82 | 39.5 |
| heart                         | 39.86 | 39.97 | >45   | 41.6 |
| Found in 1 of 3 experiments   |       |       |       |      |
| esophagus                     | >40   | >40   | 35.19 | 38.4 |
| nasal mucosa                  | >40   | >40   | 37.49 | 39.2 |
| tongue                        | >40   | >40   | 37.57 | 39.2 |
| kidney                        | >40   | >40   | 38.76 | 39.6 |
| spinal cord                   | >40   | >40   | 38.97 | 39.7 |
| tonsil                        | >40   | >40   | 39.04 | 39.7 |
| uvula                         | >40   | >40   | 39.25 | 39.8 |
| thyroid                       | >40   | >40   | 39.54 | 39.8 |
| pituitary                     | >40   | >40   | 39.89 | 40.0 |
| adrenal gland                 | 39.87 | >40   | >45   | 41.6 |
| Found in 0 of 3 experiments   |       |       |       |      |
| brain                         | >40   | >40   | >45   | 41.7 |
| intercranial artery           | >40   | >40   | >45   | 41.7 |
| liver                         | >40   | >40   | >45   | 41.7 |
| PBL (plasma blood leukocytes) | >40   | >40   | >45   | 41.7 |
| mammary gland                 | >40   | >40   | >45   | 41.7 |
| muscle                        | >40   | >40   | >45   | 41.7 |
| optic nerve                   | >40   | >40   | >45   | 41.7 |
| pericardium                   | >40   | >40   | >45   | 41.7 |

|                         |     |     |     |      |
|-------------------------|-----|-----|-----|------|
| oviduct                 | >40 | >40 | >45 | 41.7 |
| placenta                | >40 | >40 | >45 | 41.7 |
| adult islets (purified) | >40 | >40 | >45 | 41.7 |
| negative control        | >40 | >40 | >45 | 41.7 |

**Supplemental Table 6: Additional sequencing for 8 T1DGC individuals across *LOC729653*.**

Orange is a SNP that is heterozygous in individuals that are homozygous for one of the haplotypes, and yellow points out rs1233478, the only SNP that has one allele in all the low risk and neutral individuals and the opposite allele in all the high risk individuals.

| SNP        | Position | Location in <i>LOC729653</i> | Low Risk Haplotype Individual 1 | Low Risk Haplotype Individual 2 | Neutral Haplotype Individual 1 | Neutral Haplotype Individual 2 | High Risk Haplotype #1 Individual 1 | High Risk Haplotype #1 Individual 2 | High Risk Haplotype #2 Individual 1 | High Risk Haplotype #2 Individual 2 |
|------------|----------|------------------------------|---------------------------------|---------------------------------|--------------------------------|--------------------------------|-------------------------------------|-------------------------------------|-------------------------------------|-------------------------------------|
| rs1233489  | 29571022 | 5' of gene                   | TT                              | TT                              | TT                             | TT                             | AA                                  | AA                                  | TT                                  | TT                                  |
| rs11961131 | 29571259 | 5' of gene                   | TT                              | TT                              | TT                             | TT                             | TT                                  | TT                                  | TT                                  | TT                                  |
| rs11407246 | 29571275 | 5' of gene                   | -/-                             | -/-                             | -/-                            | -/-                            | -/-                                 | -/-                                 | AA                                  | AA                                  |
| rs9257870  | 29572945 | 5' of gene                   | CC                              | CC                              | CC                             | CC                             | CC                                  | CC                                  | CC                                  | CC                                  |
| rs6932526  | 29572948 | 5' of gene                   | AA                              | AA                              | AA                             | AA                             | AA                                  | AA                                  | AA                                  | AA                                  |
| rs13437558 | 29573251 | intron 1                     | CC                              | CC                              | CC                             | CC                             | CC                                  | CC                                  | CC                                  | CC                                  |
| rs2746147  | 29574587 | intron 1                     | CC                              | CC                              | TT                             | TT                             | CC                                  | CC                                  | CC                                  | CC                                  |
| rs1233487  | 29576788 | intron 1                     | AA                              | AA                              | AA                             | AA                             | GG                                  | GG                                  | AA                                  | AA                                  |
| rs1233486  | 29577631 | intron 1                     | CC                              | CC                              | TT                             | TT                             | CC                                  | CC                                  | CC                                  | CC                                  |
| rs3131019  | 29578964 | intron 1                     | CC                              | CC                              | AA                             | AA                             | AA                                  | AA                                  | AA                                  | AA                                  |
| rs11961013 | 29579913 | intron 1                     | GG                              | GG                              | GG                             | GG                             | GG                                  | GG                                  | GG                                  | GG                                  |
| rs757256   | 29580895 | intron 1                     | CC                              | CC                              | TT                             | CT                             | TT                                  | CT                                  | TT                                  | TT                                  |
| rs3130858  | 29581480 | intron 2                     | TT                              | TT                              | TT                             | TT                             | TT                                  | TT                                  | TT                                  | TT                                  |
| rs734961   | 29583018 | exon 3                       | GG                              | GG                              | GG                             | GG                             | GG                                  | GG                                  | GG                                  | GG                                  |
| rs734960   | 29583121 | 3' UTR, part 1               | CC                              | CC                              | CC                             | CC                             | CC                                  | CC                                  | CC                                  | CC                                  |
| rs6919091  | 29583303 | 3' UTR, part 1               | GG                              | GG                              | GG                             | GG                             | GG                                  | GG                                  | GG                                  | GG                                  |
| rs1002187  | 29583446 | intron 3' UTR                | GG                              | GG                              | CC                             | CC                             | CC                                  | CC                                  | CC                                  | CC                                  |
| rs1233482  | 29583661 | intron 3' UTR                | CC                              | CC                              | AA                             | AA                             | CC                                  | CC                                  | CC                                  | CC                                  |
| rs3131020  | 29583881 | intron 3' UTR                | GG                              | GG                              | AA                             | AA                             | AA                                  | AA                                  | AA                                  | AA                                  |
| rs9257877  | 29584487 | intron 3' UTR                | GG                              | GG                              | GG                             | GG                             | GG                                  | GG                                  | GG                                  | GG                                  |
| rs3131022  | 29584663 | intron 3' UTR                | CC                              | CC                              | GG                             | GG                             | GG                                  | GG                                  | GG                                  | GG                                  |
| rs35174396 | 29584811 | intron 3' UTR                | TT                              | TT                              | TT                             | TT                             | TT                                  | TT                                  | CC                                  | CC                                  |
| rs2158282  | 29584997 | intron 3' UTR                | GG                              | GG                              | GG                             | GG                             | GG                                  | GG                                  | GG                                  | GG                                  |
| rs35617617 | 29585112 | intron 3' UTR                | GG                              | GG                              | GG                             | GG                             | GG                                  | GG                                  | AA                                  | AA                                  |
| rs28675319 | 29585194 | intron 3' UTR                | TT                              | TT                              | TT                             | TT                             | TT                                  | TT                                  | TT                                  | TT                                  |
| rs1557820  | 29585219 | intron 3' UTR                | CC                              | CC                              | TT                             | TT                             | TT                                  | TT                                  | TT                                  | TT                                  |
